# Supplementary material
Source: PubMed Central journal article supplement (PMC3124689)
Supplement: 97320630006255S1.pdf [file 97320630006255S1.pdf]

## Supplementary material:

**Table 1:** Meningococcal serogroup B vaccines investigated in Clinical trials

| Components/Vaccine                                                       | References       |
|--------------------------------------------------------------------------|------------------|
| B polysaccharide                                                         | [12]             |
| N-propionylated B polysaccharide                                         | [13]             |
| Outer membrane protein and B polysaccharide                              | [14]             |
| Outer membrane vesicle, C polysaccharide and 65-95KDa enveloped proteins | [15], [16], [17] |
| Outer membrane vesicle                                                   | [18-24]          |
| Outer membrane protein and C polysaccharide                              | [25-30]          |
| Bivalent Outer membrane vesicle                                          | [31, 32]         |
| Intranasal Outer membrane vesicle                                        | [33-35]          |
| NspA                                                                     | [36]             |
| 2fusion proteins, GNA 2091-fHbp variant1 and GNA 2132-GNA1030 and NadA   | [37]             |

**Table 2:** Population coverage rate (%) of MHC Class I peptides as predicted by IEDB server

| Population/Area    | Population Coverage rate |           |           |           |            |           |           |           |
|--------------------|--------------------------|-----------|-----------|-----------|------------|-----------|-----------|-----------|
|                    | EKDLEKSVL                | RATGIKVKL | KFVAFLASK | LVKVVSVQK | KTVDAQDLLK | DAQDLLKGL | ATDMRELLK | HGKRKIISI |
| Australia          | 90.70                    | 92.68     | 91.22     | 78.71     | 91.49      | 91.42     | 65.44     | 92.38     |
| Europe             | 97.21                    | 99.03     | 98.50     | 98.07     | 99.28      | 98.95     | 81.34     | 97.51     |
| North Africa       | 53.30                    | 62.67     | 59.70     | 48.94     | 61.69      | 56.21     | 16.67     | 65.70     |
| North America      | 97.07                    | 98.51     | 98.14     | 90.77     | 98.35      | 97.66     | 86.40     | 96.75     |
| North East Asia    | 86.25                    | 89.87     | 90.35     | 87.41     | 93.11      | 91.15     | 58.81     | 91.54     |
| Oceania            | 95.08                    | 96.13     | 95.19     | 86.16     | 95.61      | 94.86     | 70.12     | 96.64     |
| Other              | 95.73                    | 96.92     | 96.87     | 95.32     | 97.81      | 96.75     | 75.05     | 95.52     |
| South America      | 89.33                    | 92.09     | 92.04     | 91.92     | 92.31      | 92.27     | 83.23     | 86.88     |
| South East Asia    | 92.84                    | 95.54     | 93.51     | 89.59     | 96.89      | 95.68     | 71.21     | 95.99     |
| South West Asia    | 92.71                    | 92.42     | 94.91     | 93.99     | 95.46      | 93.78     | 55.62     | 94.15     |
| Sub-Saharan Africa | 86.24                    | 87.16     | 87.02     | 89.37     | 91.49      | 89.42     | 48.09     | 85.14     |
| AVERAGE            | 78.72                    | 81.26     | 80.69     | 75.54     | 83.13      | 81.62     | 59.55     | 81.00     |
| Standard Deviation | 30.30                    | 29.25     | 29.22     | 29.00     | 29.31      | 29.32     | 28.29     | 28.99     |

**Table 3:** Population coverage rate (%) of MHC Class II peptides as predicted by IEDB server.

| Population/Area    | Population coverage rate (%) |              |
|--------------------|------------------------------|--------------|
|                    | KPYAKNSVALQAV                | VQKAVGSILVAG |
| Australia          | 43.75                        | 47.95        |
| Europe             | 43.53                        | 52.92        |
| North Africa       | 67.90                        | 78.74        |
| North America      | 38.52                        | 36.57        |
| North East Asia    | 71.54                        | 76.15        |
| Oceania            | 61.80                        | 65.97        |
| Other              | 67.88                        | 79.47        |
| South America      | 21.09                        | 23.77        |
| South East Asia    | 16.04                        | 16.95        |
| South West Asia    | 64.97                        | 79.10        |
| Sub-Saharan Africa | 44.82                        | 62.01        |
| AVERAGE            | 24.41                        | 27.92        |
| Standard Deviation | 28.93                        | 33.33        |

**Table 4:** List of MHC Class I T-cell epitopes with their corresponding HLA alleles, as predicted by Sypfeithi, nHLAPred, ProPred1, NetCTL and immunogenicity by POPI, showing the selected 10-mer epitope <sup>148</sup>KTVDAQDLLK<sup>157</sup> (high) and 9-mer epitope <sup>44</sup>RATGIKVKL<sup>52</sup> (moderate) immunogenicity and that bind to maximum no. of HLA molecules obtained from FrpB and FbpA proteins respectively.

| Sl. No | Epitope core (9-mer) | Protein (Acc.no) | Amino Acid position | Immunogenicity as predicted by POPI server | Total No of binding HLA molecules | HLA alleles predicted to bind to the epitope                                                                                                                                                                                                                                                                                                                                                                                                                                                                                                                                                                                                                                                                      |
|--------|----------------------|------------------|---------------------|--------------------------------------------|-----------------------------------|-------------------------------------------------------------------------------------------------------------------------------------------------------------------------------------------------------------------------------------------------------------------------------------------------------------------------------------------------------------------------------------------------------------------------------------------------------------------------------------------------------------------------------------------------------------------------------------------------------------------------------------------------------------------------------------------------------------------|
| 1      | EKDLEKSVL            | FbpA (NMB0634)   | 136                 | High Immunogenic                           | 91                                | HLA A1, HLA A2, HLA A*0201, HLA A*0205, HLA A24, HLA A*3302, HLA A68.1, HLA A20, HLA A20Cw, HLA A2.1, HLA B14, HLA B*2702, HLA B*2705, HLA B*3501, HLA B*3701, HLA B*3801, HLA B*3901, HLA B*3902, HLA B40, HLA B*4403, HLA B*5101, HLA B*5102, HLA B*5103, HLA B*5201, HLA B*5801, HLA B60, HLA B61, HLA B7, HLA B*0702, HLA B8, HLA Cw*0301, HLA Cw*0401, HLA Cw*0602, HLA Cw*0702, HLA A*26, HLA B*3902, HLA B*4401, HLA A*0111, HLA A*0201, HLA A*03, HLA A*1101, HLA A*2402, HLA A*26, HLA B*0602, HLA B*1402, HLA B*1510, HLA B*18, HLA B*2705, HLA B*3801, HLA B*3901, HLA B*3902, HLA A*2601, HLA A*2602, HLA A*2603, HLA A*2605, HLA A*2606, HLA A*2608, HLA A*2609, HLA A*2611, HLA A*2612, HLA A*2618, |

|   |           |                   |     |                         |    |                                                                                                                                                                                                                                                                                                                                                                                                                                                                                                                                                                                                                                                                                                                                                                                                                                                                                                                                                                                                                                                                                    |
|---|-----------|-------------------|-----|-------------------------|----|------------------------------------------------------------------------------------------------------------------------------------------------------------------------------------------------------------------------------------------------------------------------------------------------------------------------------------------------------------------------------------------------------------------------------------------------------------------------------------------------------------------------------------------------------------------------------------------------------------------------------------------------------------------------------------------------------------------------------------------------------------------------------------------------------------------------------------------------------------------------------------------------------------------------------------------------------------------------------------------------------------------------------------------------------------------------------------|
| 2 | RATGIKVKL | FbpA<br>(NMB0634) | 44  | Moderate<br>Immunogenic | 91 | HLA B*0801, HLA B*0803, HLA B*0804, HLA B*0805, HLA B*39, HLA B*3902, HLA B*3903, HLA B*3905, HLA-B*3906, HLA-B*3907, HLA-B*3908, HLA-B*3910, HLA-B*3911, HLA-B*3913, HLA B*3915, HLA B*2702, HLA B*2703, HLA B*2704, HLA B*2705, HLA B*2706, HLA B*2707, HLA B*2709, HLA B*2711, HLA B*2714, HLA B*4701, HLA B*4901                                                                                                                                                                                                                                                                                                                                                                                                                                                                                                                                                                                                                                                                                                                                                               |
| 3 | KFVAFLASK | FbpA<br>(NMB0634) | 268 | High<br>Immunogenic     | 94 | HLA A1, HLA A2, HLA A*0201, HLA A*0205, HLA A24, HLA A*3302, HLA A 68.1, HLA A20, HLA A20Cw, HLA A2.1, HLA B14, HLA B*2702, HLA B*2705,HLA B*3501, HLA B*3701, HLA B*3801, HLA B*3901, HLA B*3902, HLA B40, HLA B*4403, HLA B*5101, HLA B*5102, HLA B*5103, HLA B*5201, HLA B*5801, HLA B60, HLA B61, HLA B7, HLA B*0702, HLA B8, HLA Cw*0301, HLA Cw*0401, HLA Cw*0602, HLA Cw*0702, HLA A*1101, HLA A3, HLA A*3101, HLA B*5401, HLA B*51, HLA B62HLA A*2402, HLA A*6801, HLA B*0702, HLA B*1402, HLA B*1501, HLA B*1510, HLA B*18, HLA B*2705, HLA B*2709, HLA B*3901, HLA B*3902, HLA B*4001, HLA B*4701, HLA B*4901, HLA B*0801, HLA B*0803, HLA B*0804, HLA B*0805, HLA B*39, HLA B*3903, HLA B*3905, HLA B*3906, HLA B*3907, HLA B*3908, HLA B*3910, HLA B*3911, HLA B*3913, HLA B*3915, HLA B*2702, HLA B*2703, HLA B*2704, HLA B*2706, HLA B*2707, HLA B*2711, HLA B*2714, HLA A*2402, HLA A*240201, HLA B*4402, HLA B*4404, HLA B*4404, HLA B*4405, HLA B*4406, HLA B*4407, HLA B*4408, HLA B*4410, HLA B*4415, HLA B*4426                                                |
| 4 | LVKVVSVQK | FrpB<br>(NMB1988) | 121 | High<br>Immunogenic     | 99 | HLA A1, HLA A2, HLA A*0201, HLA A*0205, HLA A24, HLA A*3302, HLA A68.1, HLA A20, HLA A20Cw, HLA A2.1, HLA B14, HLA B*2702, HLA B*2705,HLA B*3501, HLA B*3701, HLA B*3801, HLA B*3901, HLA B*3902, HLA B40, HLA B*4403, HLA B*5101, HLA B*5102, HLA B*5103, HLA B*5201, HLA B*5801, HLA B60, HLA B61, HLA B7, HLA B8, HLA Cw*0301, HLA Cw*0401, HLA Cw*0602, HLA Cw*0702, HLA A*1101, HLA A*3101, HLA B*62, HLA A*03, HLA A*01, HLA A*0201, HLA A*6801, HLA A*26, HLA B*08, HLA B*0702, HLA B*1402, HLA B*18, HLA B*5001, HLA A*0301, HLA A*0302, HLA A*2402, HLA A*240201, HLA A*2601, HLA A*2602, HLA A*2603, HLA A*2605, HLA A*2608, HLA A*2609, HLA A*2611, HLA A*2612, HLA A*2618, HLA B*2702, HLA B*2703, HLA B*2704, HLA B*2705, HLA B*2706, HLA B*2707, HLA B*2709, HLA B*2711, HLA B*2714, HLA B*39, HLA B*3901, HLA B*3902, HLA B*3903, HLA B*3905, HLA B*3906, HLA B*3907, HLA B*3908, HLA B*3910, HLA B*3911, HLA B*3913, HLA B*3915, HLA B*4402,HLA B*4404, HLA B*4404, HLA B*4405, HLA B*4406, HLA B*4407, HLA B*4408, HLA B*4410, HLA B*4415, HLA B*4426, HLA B*5802 |

|   |            |                   |     |                         |     |                                                                                                                                                                                                                                                                                                                                                                                                                                                                                                                                                                                                                                                                                                                                                                                                                                                                                                                                                                                                                                                                                                                                                                                                                                                                                                                                                                                                     |
|---|------------|-------------------|-----|-------------------------|-----|-----------------------------------------------------------------------------------------------------------------------------------------------------------------------------------------------------------------------------------------------------------------------------------------------------------------------------------------------------------------------------------------------------------------------------------------------------------------------------------------------------------------------------------------------------------------------------------------------------------------------------------------------------------------------------------------------------------------------------------------------------------------------------------------------------------------------------------------------------------------------------------------------------------------------------------------------------------------------------------------------------------------------------------------------------------------------------------------------------------------------------------------------------------------------------------------------------------------------------------------------------------------------------------------------------------------------------------------------------------------------------------------------------|
| 5 | KTVDAQDLLK | FrpB<br>(NMB1988) | 148 | High<br>Immunogenic     | 121 | HLA A1, HLA A2, HLA A*0201, HLA A*0205, HLA A24, HLA A*3302, HLA A68.1, HLA A20, HLA A20Cw, HLA B14, HLA B*2702, HLA B*2705, HLA B*3501, HLA B*3701, HLA B*3801, HLA B*3901, HLA B*3902, HLA B40, HLA B*4403, HLA B*5101, HLA B*5102, HLA B*5103, HLA B*5201, HLA B*5801, HLA B60, HLA B61, HLA B7, HLA Cw*0301, HLA Cw*0401, HLA Cw*0602, HLA Cw*0702, HLA A*1101, HLA A*3101, HLA A3, HLA B*5401, HLA B*51, HLA B 62, HLA A*3301, HLA A*6801, HLA B*0702, HLA B*1402, HLA B*1501, HLA B*1510, HLA B*2705, HLA A*0203, HLA A*01, HLA A*03, HLA A*1101, HLA A*2402, HLA A*26, HLA A*6801, HLA B*08, HLA B*1402, HLA A*0201, HLA A*0202, HLA A*0203, HLA A*0204, HLA A*0205, HLA A*0207, HLA A*0208, HLA A*0210, HLA A*0211, HLA A*0212, HLA A*0213, HLA A*0214, HLA *0216, HLA A*0217, HLA A*0219, HLA A*0220, HLA A*0222, HLA A*0224, HLA A*0225, HLA A*0226, HLA A*0228, HLA A*0233, HLA A*0234, HLA A*0236, HLA A*0240, HLA A*0244, HLA A*0245, HLA A*0246, HLA A*0301, HLA A*0302, HLA A*2402, HLA A*240201, HLA A*2601, HLA A*2602, HLA A*2603, HLA A*2605, HLA A*2608, HLA A*2609, HLA A*2611, HLA A*2612, HLA A*2618, HLA B*0704, HLA B*0705, HLA B*0707, HLA B*0712, HLA B*0717, HLA B*0720, HLA B*0726, HLA B*0801, HLA B*0803, HLA B*0804, HLA B*0805, HLA B*4402, HLA B*4403, HLA B*4404, HLA B*4405, HLA B*4406, HLA B*4407, HLA B*4408, HLA B*4410, HLA B*4415, HLA B*4426, HLA B*5802 |
| 6 | DAQDLLKGL  | FrpB<br>(NMB1988) | 151 | High<br>Immunogenic     | 113 | HLA A1, HLA A2, HLA A*0201, HLA A*0205, HLA A24, HLA A*3302, HLA A68.1, HLA A20, HLA A20Cw, HLA B14, HLA B*2702, HLA B*2705, HLA B*3501, HLA B*3701, HLA B*3801, HLA B*3901, HLA B*3902, HLA B40, HLA B*4403, HLA B*5101, HLA B*5102, HLA B*5103, HLA B*5201, HLA B*5801, HLA B60, HLA B61, HLA B7, HLA B*0702, HLA B8, HLA Cw*0301, HLA Cw*0401, HLA Cw*0602, HLA Cw*0702, HLA A*1101, HLA A3, HLA A*3101, HLA B*5401, HLA B62, HLA A*0203, HLA B*3701, HLA B*3801, HLA B*3901, HLA B*3902, HLA B60, HLA A*03, HLA A*2402, HLA A*6801, HLA A*08, HLA A*1402, HLA A*2705, HLA A*0203, HLA B40, HLA A*03, HLA A*2402, HLA A*26, HLA A*6801, HLA B*1402, HLA A*0202, HLA A*0204, HLA A*0205, HLA A*0207, HLA A*0208, HLA A*0210, HLA A*0211, HLA A*0212, HLA A*0213, HLA A*0214, HLA A*0216, HLA A*0217, HLA A*0219, HLA A*0220, HLA A*0222, HLA A*0224, HLA A*0225, HLA A*0226, HLA A*0228, HLA A*0233, HLA A*0234, HLA A*0236, HLA A*0240, HLA A*0244, HLA A*0245, HLA A*0246, HLA A*0301, HLA A*0302, HLA A*240201, HLA B*0702, HLA B*0704, HLA B*0705, HLA B*0707, HLA B*0712, HLA B*0717, HLA B*0720, HLA B*0726, HLA B*0801, HLA B*0803, HLA B*0804, HLA B*0805, HLA B*4402, HLA B*4403, HLA B*4404, HLA B*4405, HLA B*4406, HLA B*4407, HLA B*4408, HLA B*4410, HLA B*4415, HLA B*4426, HLA B*5802                                                                                             |
| 7 | ATDMRELLK  | FrpB<br>(NMB1988) | 60  | High<br>Immunogenic     | 62  | HLA A*01, HLA A*2402, HLA A*26, HLA B*2705, HLA A*0201, HLA A*0202, HLA A*0203, HLA A*0204, HLA A*0205, HLA A*0207, HLA A*0208, HLA A*0210, HLA A*0211, HLA A*0212, HLA A*0213, HLA A*0214, HLA A*0216, HLA A*0217, HLA A*0219, HLA A*0220, HLA A*0222, HLA A*0224, HLA A*0225, HLA A*0226, HLA A*0228, HLA A*0233, HLA A*0234, HLA A*0236, HLA A*0240, HLA A*0244, HLA A*0245, HLA A*0246, HLA A*0301, HLA A*0302, HLA A*240201, HLA B*0702, HLA B*0704, HLA B*0705, HLA B*0707, HLA B*0712, HLA B*0717, HLA B*0720, HLA B*0726, HLA B*0801, HLA B*0803, HLA B*0804, HLA B*0805, HLA B*4402, HLA B*4403, HLA B*4404, HLA B*4405, HLA B*4406, HLA B*4407, HLA B*4408, HLA B*4410, HLA B*4415, HLA B*4426, HLA B*5802                                                                                                                                                                                                                                                                                                                                                                                                                                                                                                                                                                                                                                                                                |
| 8 | HGKRGIIISI | FrpB<br>(NMB1988) | 488 | Moderate<br>Immunogenic | 81  | HLA A1, HLA A2, HLA A*0201, HLA A*0205, HLA A24, HLA A*3302, HLA A68.1, HLA A20, HLA A20Cw, HLA A2.1, HLA B14, HLA B*2702, HLA B*2705, HLA B*3501, HLA B*3701, HLA B*3801, HLA B*3901, HLA B*3902, HLA B40, HLA B*4403, HLA B*5101, HLA B*5102, HLA B*5103, HLA B*5201, HLA B*5801, HLA B60, HLA B61, HLA B7, HLA B*0702, HLA B8, HLA Cw*0301, HLA Cw*0401, HLA Cw*0602, HLA Cw*0702, HLA A*1101, HLA A3, HLA A*3101, HLA B*5401, HLA B*51, HLA B62, HLA B*5201, HLA B*4402, HLA B*4501, HLA B*4701, HLA B*4901, HLA B*5001, HLA B*2709, HLA B*4101, HLA B*4001,                                                                                                                                                                                                                                                                                                                                                                                                                                                                                                                                                                                                                                                                                                                                                                                                                                    |

HLA A\*2402, HLA A\*240201, HLA A\*2601, HLA A\*2602, HLA A\*2603, HLA A\*2605, HLA A\*2608, HLA A\*2609, HLA A\*2611, HLA A\*2612, HLA A\*2618, HLA B\*0702, HLA B\*0704, HLA B\*0705, HLA B\*0707, HLA B\*0712, HLA B\*0717, HLA B\*0720, HLA B\*0726, HLA B\*4404, HLA B\*4405, HLA B\*4406, HLA B\*4407, HLA B\*4408, HLA B\*4410, HLA B\*4415

**Table 5:** List of MHC Class II T-cell epitopes with their corresponding HLA alleles, as predicted by Syfpeithi, nHLAPred, ProPred1, NetCTL and immunogenicity by POPI, showing the selected 12-mer epitope <sup>629</sup>VQKAVGSILVAG<sup>640</sup> with high immunogenicity and that binds to maximum no. of HLA molecules from FrpB protein.

| Sl. No | Epitope core (9-mer) | Protein (Acc.no) | Amino Acid position | Immunogenicity as predicted by POPI server | Total No of binding HLA molecules | HLA alleles predicted to bind to the epitope                                                                                                                                                                                                                                                                                                                                                                                                                                                                                                                                                                                                                                                                                                   |
|--------|----------------------|------------------|---------------------|--------------------------------------------|-----------------------------------|------------------------------------------------------------------------------------------------------------------------------------------------------------------------------------------------------------------------------------------------------------------------------------------------------------------------------------------------------------------------------------------------------------------------------------------------------------------------------------------------------------------------------------------------------------------------------------------------------------------------------------------------------------------------------------------------------------------------------------------------|
| 1      | KPYAKNSVALQAV        | FbpA (NMB0634)   | 192-204             | High                                       | 42/51                             | HLA DRB1*0305, HLA DRB1*0306, HLA DRB1*0307, HLA DRB1*0308, HLA DRB1*0309, HLA DRB1*0401, HLA DRB1*0402, HLA DRB1*0404, HLA DRB1*0405, HLA DRB1*0408, HLA DRB1*0410, HLA DRB1*0421, HLA DRB1*0423, HLA DRB1*0426, HLA DRB1*0701, HLA DRB1*0703, HLA DRB1*0801, HLA DRB1*0802, HLA DRB1*0804, HLA DRB1*0806, HLA DRB1*0814, HLA DRB1*1106, HLA DRB1*1107, HLA DRB1*1114, HLA DRB1*1121, HLA DRB1*1128, HLA DRB1*1302, HLA DRB1*1304, HLA DRB1*1305, HLA DRB1*1307, HLA DRB1*1311, HLA DRB1*1321, HLA DRB1*1322, HLA DRB1*1323, HLA DRB1*1327, HLA DRB1*1328, HLA DRB1*1501, HLA DRB1*1502, HLA DRB1*1506, HLA DRB1*0101, HLA DRB1*0105, HLA DRB1*0102                                                                                           |
| 2      | VQKAVGSILVAG         | FrpB (NMB1988)   | 629-640             | High                                       | 48/51                             | HLA DRB1*0101, HLA DRB1*0102, HLA DRB1*0301, HLA DRB1*0305, HLA DRB1*0306, HLA DRB1*0307, HLA DRB1*0308, HLA DRB1*0309, HLA DRB1*0311, HLA DRB1*0401, HLA DRB1*0402, HLA DRB1*0404, HLA DRB1*0405, HLA DRB1*0408, HLA DRB1*0421, HLA DRB1*0423, HLA DRB1*0426, HLA DRB1*0701, HLA DRB1*0703, HLA DRB1*0801, HLA DRB1*0802, HLA DRB1*0804, HLA DRB1*0806, HLA DRB1*0814, HLA DRB1*1106, HLA DRB1*1107, HLA DRB1*1114, HLA DRB1*1120, HLA DRB1*1121, HLA DRB1*1128, HLA DRB1*1301, HLA DRB1*1302, HLA DRB1*1304, HLA DRB1*1305, HLA DRB1*1307, HLA DRB1*1311, HLA DRB1*1321, HLA DRB1*1322, HLA DRB1*1323, HLA DRB1*1327, HLA DRB1*1328, HLA DRB1*1501, HLA DRB1*1502, HLA DRB1*1506, HLA DRB1*0101, HLA DRB1*0105, HLA DRB1*1505, HLA DRB1*1506 |
